# Supplementary material for: Novel pH sensor based on anthraquinone–ferrocene modified free standing gold nanowire array electrode
Source: Royal Society of Chemistry journal article supplement (doi:10.1039/c2ay26264a), 2012-12-14
Supplement: c2ay26264a.pdf [file c2ay26264a.pdf]

## Supplementary Information

# Novel pH sensor based on anthraquinone–ferrocene modified free standing gold nanowire array electrode

Louise Devlin, Mamun Jamal\* and Kafil M. Razeeb

Received (in XXX, XXX) Xth XXXXXXXXXX 20XX, Accepted Xth XXXXXXXXXX 20XX

DOI: 10.1039/b000000x

Tyndall National Institute, University College Cork, Lee Maltings, Dyke Parade, Cork, Ireland

\*Email: [mamun.jamal@tyndall.ie](mailto:mamun.jamal@tyndall.ie)

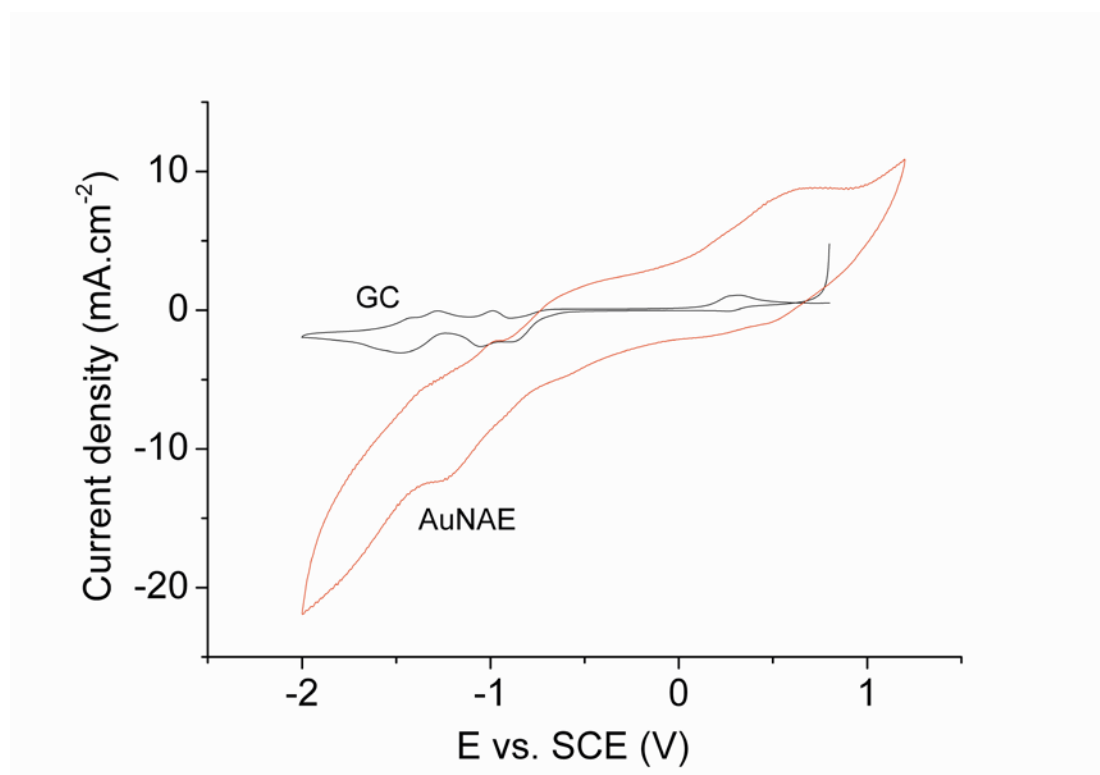

**Fig. S1** Cyclic voltammograms of GC and AuNAE in AQ-Fc dissolved in acetonitrile (electrolyte: 0.1 M tetrabutyl ammonium hexafluorophosphate).

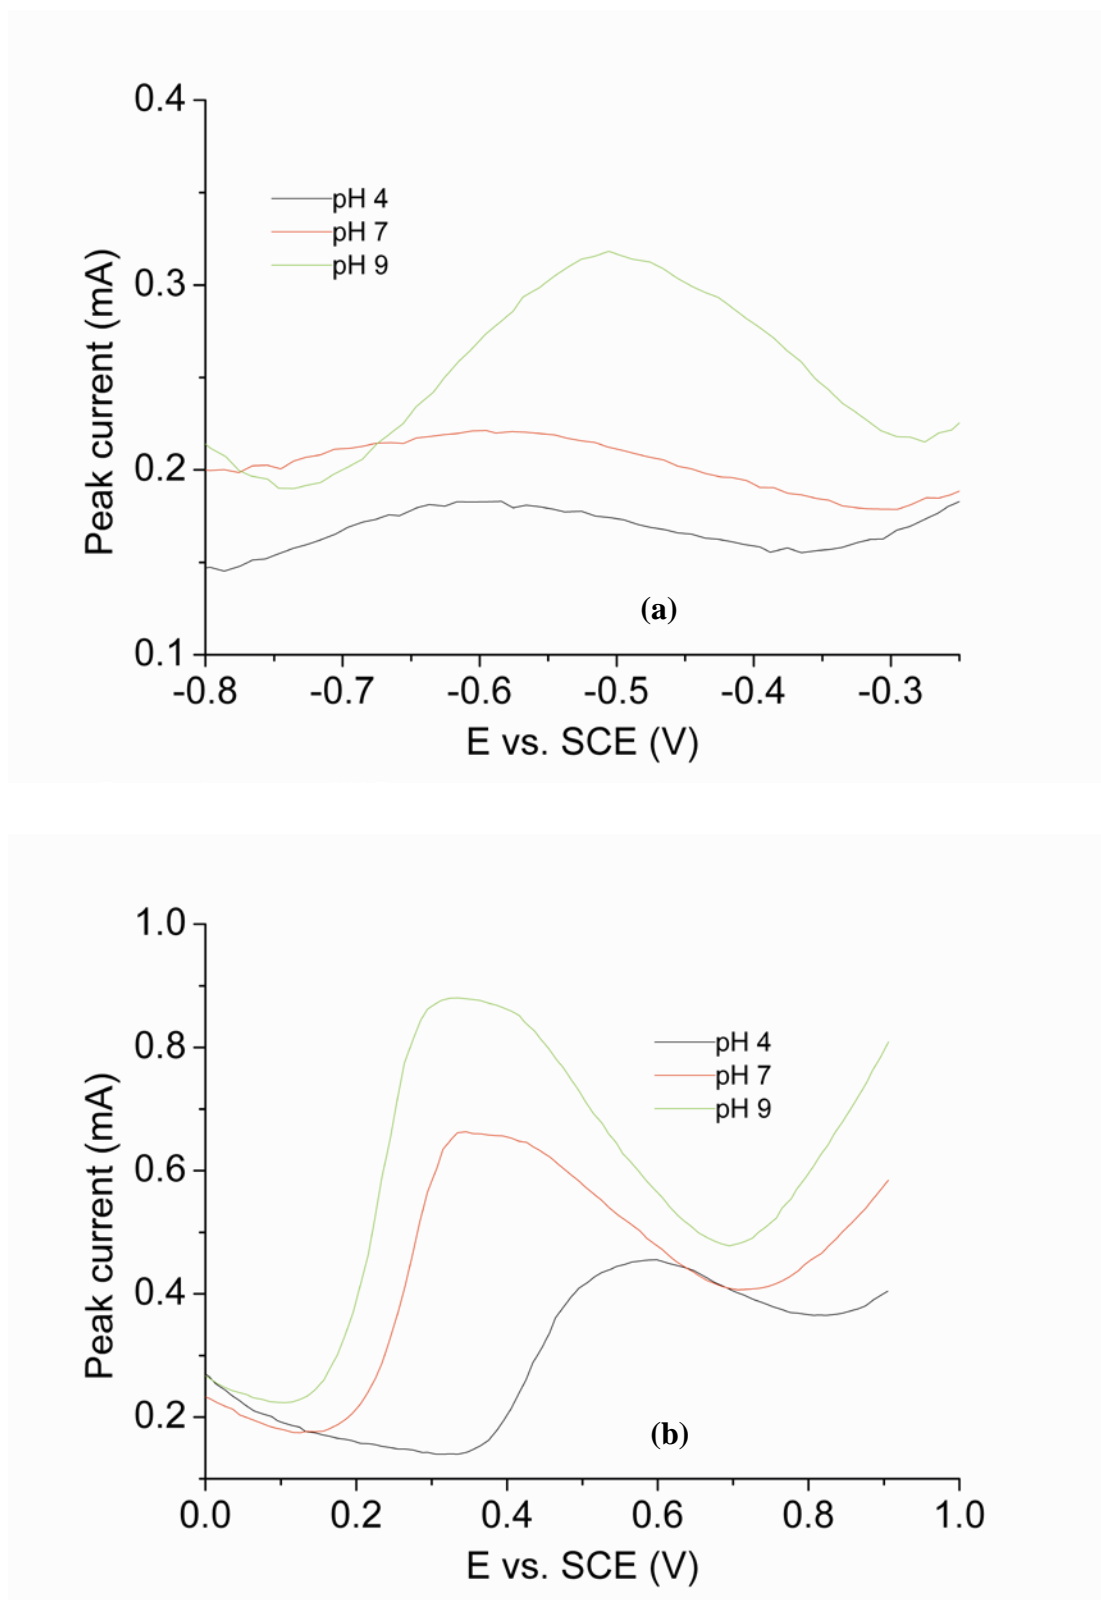

**Fig. S2** SWV of AQ-Fc modified AuNAE in various pH solutions (a) potential range from -0.8 to -0.35 V; (b) potential range from 0 to 0.9 V.

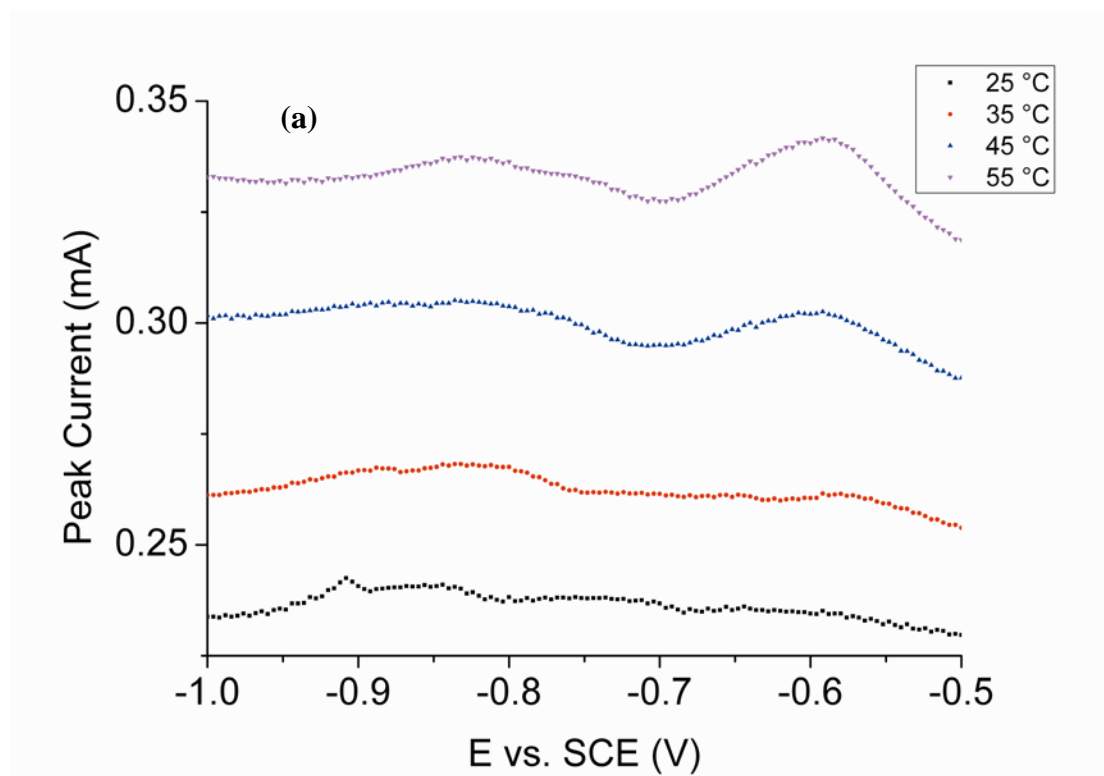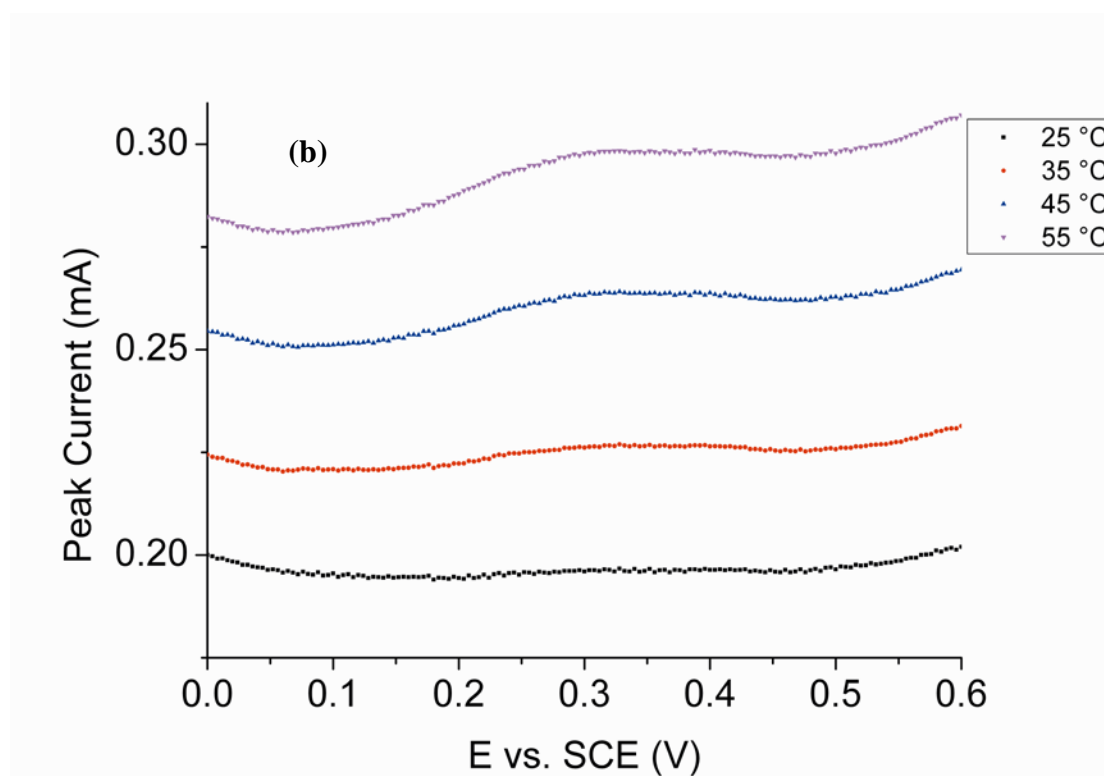

**Fig. S3** SWV of AQ-Fc modified AuNAE in pH 7 at various temperatures (25, 35, 45 and 55 °C) (a) potential range from -1.0 to -0.50 V; (b) potential range from 0.0 to +0.6 V.

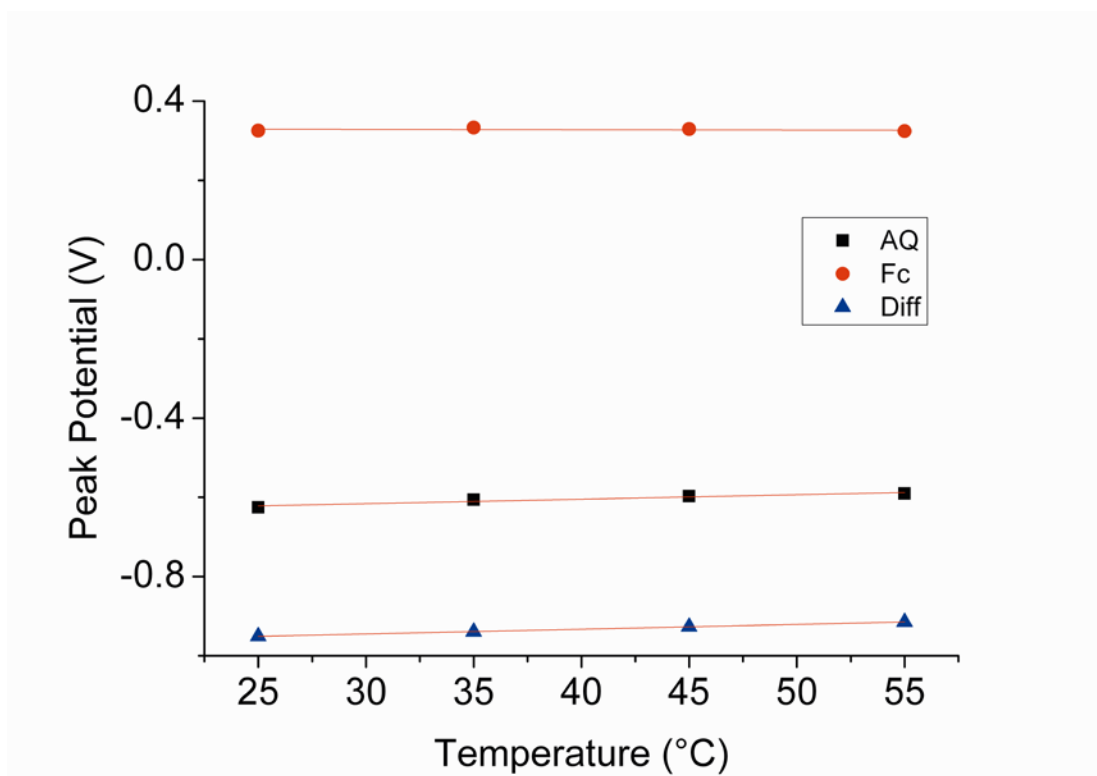

**Fig. S4** A plot of peak potential against temperature for the Fc, the AQ and the difference in peak potential between both Fc and AQ, at pH 7.
